# Supplementary material for: Mapping the Galvanic Corrosion of Three Metals Coupled with a Wire Beam Electrode: The Influence of Temperature and Relative Geometrical Position
Source: MDPI journal article supplement (doi:10.3390/ma11030357), 2018-02-28
Supplement: s1 [file s1]

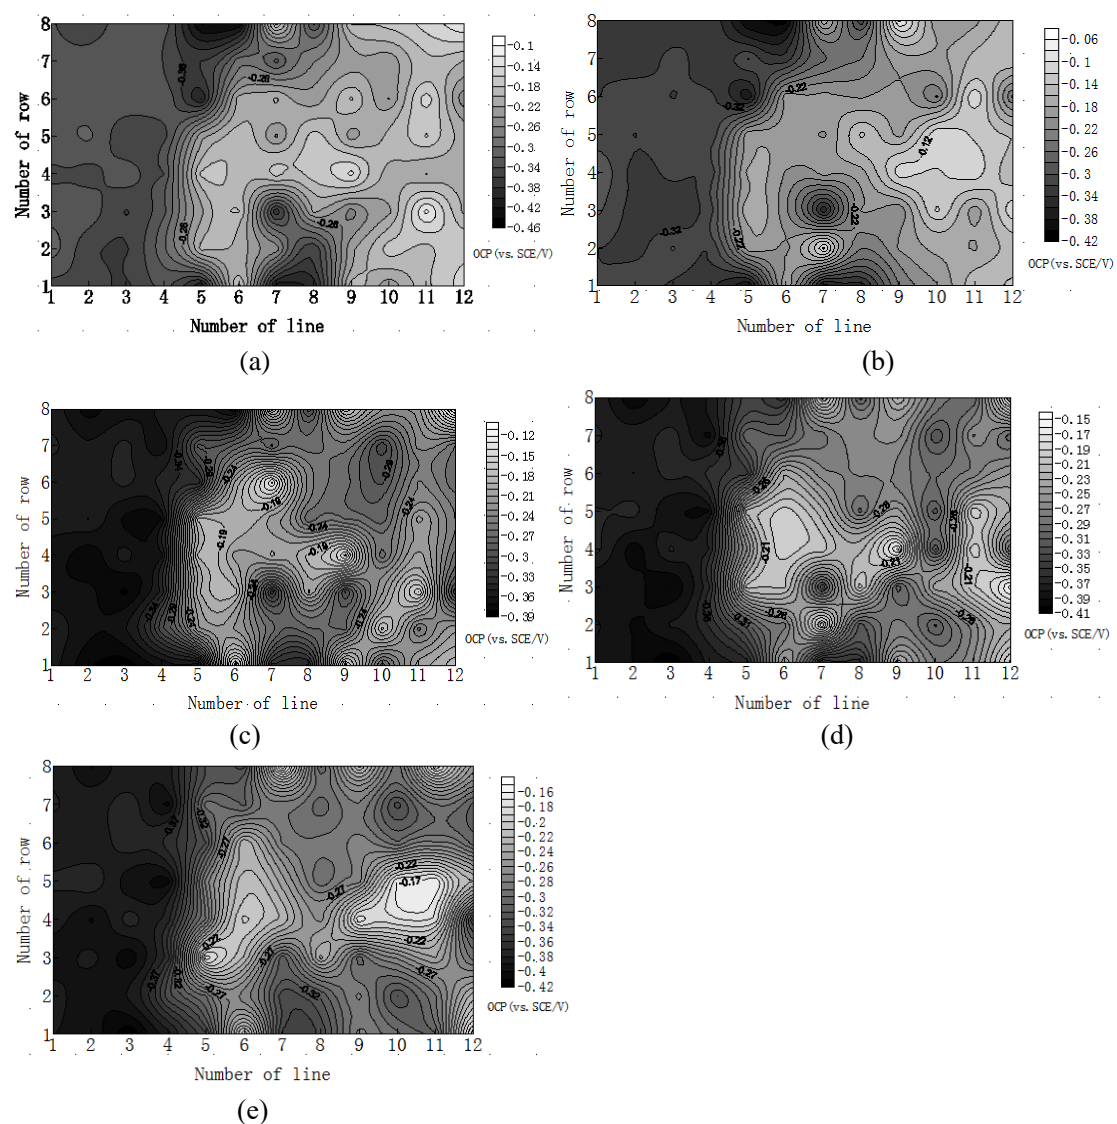

Figure S1. OCP (vs. SCE/V) distribution maps of the WBE1 after immersion in artificial seawater at different temperatures: (a) 30°C; (b) 40°C; (c) 50°C; (d) 60°C; (e) 70°C.

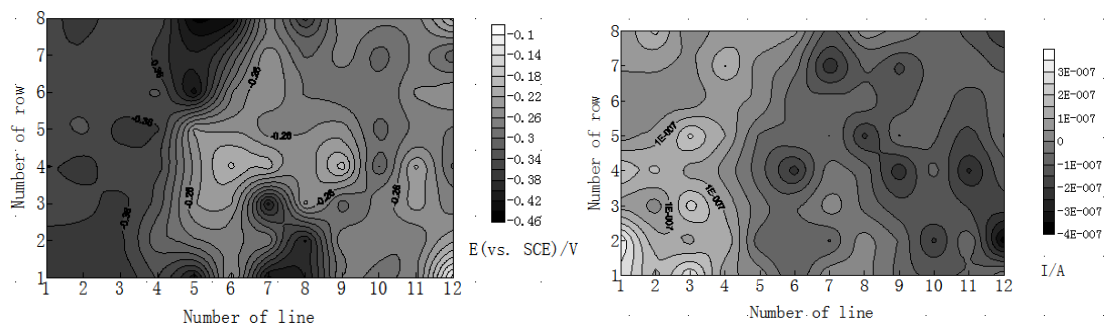

(a)

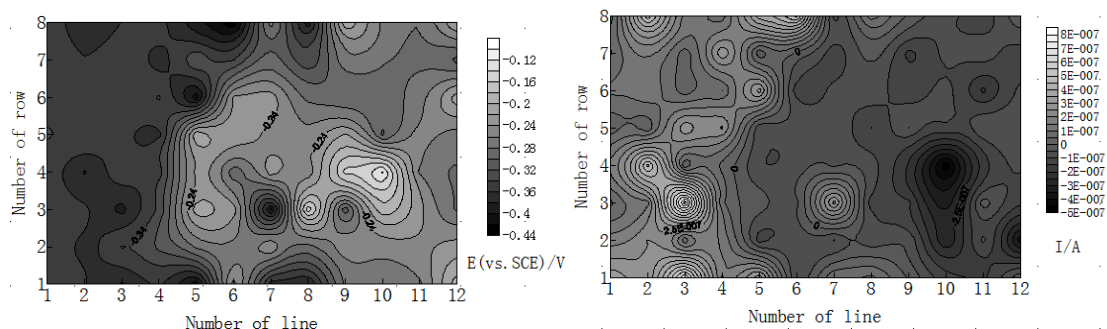

(b)

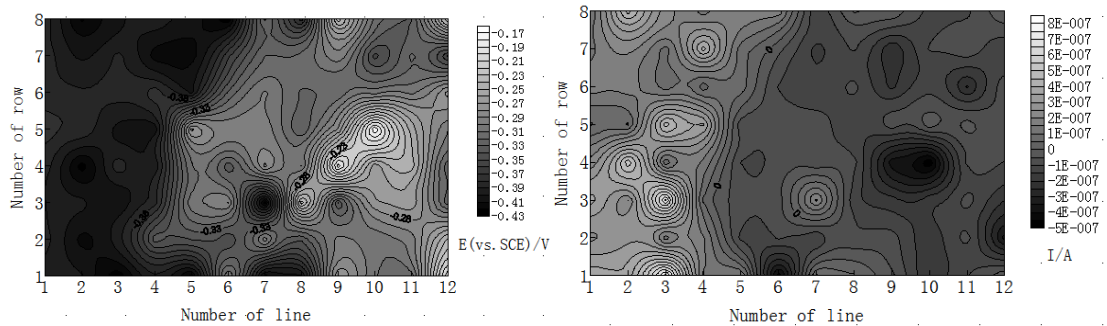

(c)

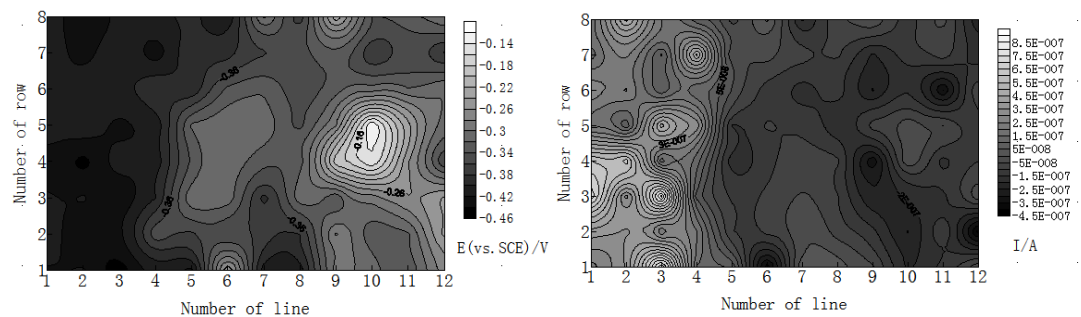

(d)

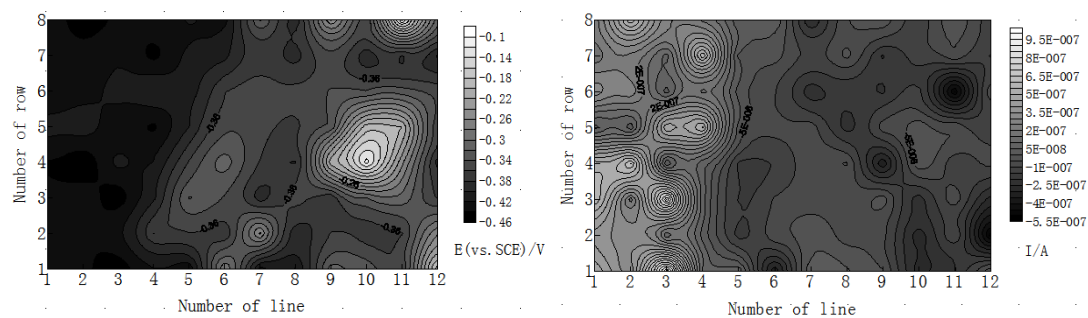

(e)

Figure S2. Spatial potential (left, E vs. SCE/V) and current-density (right, I/A) distribution maps of WBE1 after being short-circuited for 12 h in artificial seawater at different temperatures: (a) 30°C; (b) 40°C; (c) 50°C; (d) 60°C; (e) 70°C.
